# Supplementary material for: Design of spin-forbidden transitions for polypyridyl metal complexes by time-dependent density functional theory including spin–orbit interaction
Source: Royal Society of Chemistry journal article supplement (doi:10.1039/c6cp01461e), 2016-01-01
Supplement: c6cp01461e1.pdf [file c6cp01461e1.pdf]

**Design of Spin-Forbidden Transitions for Polypyridyl Metal  
Complexes by Relativistic Time-dependent Density Functional Theory  
Including Spin-orbit Interaction**

Shohei Kanno, Yutaka Imamura,\* Masahiko Hada

Department of Chemistry, Tokyo Metropolitan University, Hachioji, Tokyo,  
Japan

---

\*Corresponding author

*E-mail address:* yimamura@tmu.ac.jp, Yutaka Imamura

### Part 1 : Frontier orbitals of DX1-Fe-X (X = Cl, Br and I)

The contributions of the atomic orbitals for frontier orbitals of DX1-Fe-X (X = Cl, Br and I) are given in Table S1. The occupied frontier orbitals are composed of Fe  $t_{2g}$  and halogen p orbitals, which is similar to the case of the DX1-based dyes. The similar tendency that the contributions of atomic orbitals increase for halogen p molecular orbitals as the halogen atomic number increases, is confirmed.

**Table S1** Characters of frontier orbitals of DX1-Fe-X (X = Cl, Br and I).

| Molecules        | Orbital | Fe character                 | Halogen character      |
|------------------|---------|------------------------------|------------------------|
| <b>DX1-Fe-Cl</b> | HOMO    | $d_{xz}$ :68%                | $p_x$ :24%             |
|                  | HOMO-1  | $d_{yz}$ :66%                | $p_y$ :27%             |
|                  | LUMO    | $d_{yz}$ :2%, $d_{xz}$ :1%   | $p_z$ :2%              |
|                  | LUMO+1  | $d_{xz}$ :2%                 | 0%                     |
| <b>DX1-Fe-Br</b> | HOMO    | $d_{yz}$ :21%, $d_{xz}$ :34% | $p_x$ :22%, $p_y$ :7%  |
|                  | HOMO-1  | $d_{yz}$ :33%, $d_{xz}$ :25% | $p_x$ :14%, $p_y$ :24% |
|                  | LUMO    | $d_{yz}$ :2%, $d_{xz}$ :1%   | $p_z$ :3%              |
|                  | LUMO+1  | $d_{xz}$ :2%                 | 0%                     |
| <b>DX1-Fe-I</b>  | HOMO    | $d_{yz}$ :25%, $d_{xz}$ :5%  | $p_x$ :10%, $p_y$ :57% |
|                  | HOMO-1  | $d_{yz}$ :5%, $d_{xz}$ :33%  | $p_x$ :50%, $p_y$ :10% |
|                  | LUMO    | $d_{yz}$ :2%, $d_{xz}$ :1%   | $p_z$ :5%              |
|                  | LUMO+1  | $d_{xz}$ :2%                 | 0%                     |

## Part 2 : The assignments of the absorption peaks of DX1-Fe-X (X = Cl, Br and I)

Fig. S1 and Table S2 show the assignments of the absorption peaks of DX1-Fe-X (X = Cl, Br and I). For all dyes, four excited states calculated by SR-TDDFT in the long wavelength region, i.e., two singlet excited states  $S_3$  (HOMO  $\rightarrow$  LUMO) and  $S_4$  (HOMO-1  $\rightarrow$  LUMO) and two triplet excited states  $T_7$  (HOMO  $\rightarrow$  LUMO) and  $T_8$  (HOMO-1  $\rightarrow$  LUMO) are involved in the low-lying excited states obtained by SO-TDDFT. The absorption peaks of  $S_3$ ,  $S_4$ ,  $T_7$  and  $T_8$  appear at 2.10, 2.32, 1.98 and 2.04 eV with  $f = 0.031$ , 0.029, 0.000 and 0.000 for DX1-Fe-Cl, whereas the same peaks for DX1-Ru-Br appear at 2.08, 2.26, 1.96 and 2.02 eV with  $f = 0.025$ , 0.023, 0.000 and 0.000 and for DX1-Ru-I appear at 2.09, 2.23, 2.00 and 2.06 eV with  $f = 0.021$ , 0.013, 0.000 and 0.000.

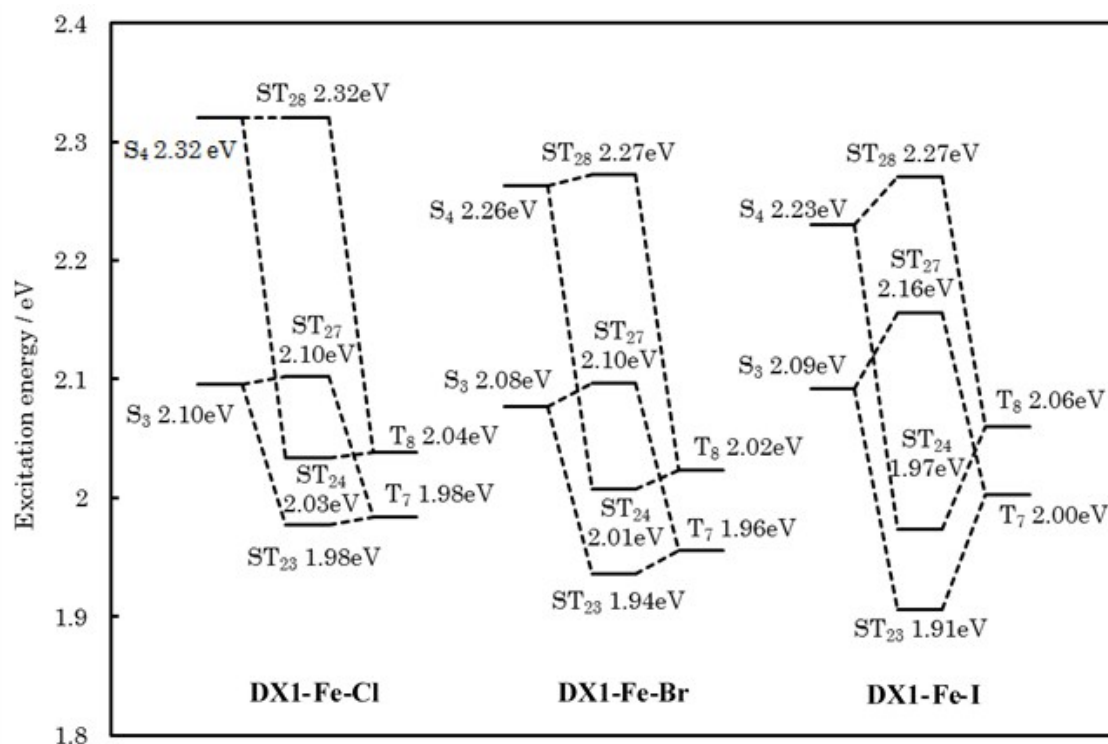

**Fig. S1** Excitation energies of DX1-Fe-X (X = Cl, Br, and I) in acetonitrile solution. In respective molecules, excited states obtained by SR-TDDFT and SO-TDDFT are given left, right and center, respectively.

**Table S2** Assignments of absorption spectra of DX1-Fe-X (X = Cl, Br, and I) calculated by SO-TDDFT and SR-TDDFT. Excitation energies, oscillator strengths, and contributions of SR states in states calculated by SO-TDDFT are given, respectively.

| Molecules        | Perturbative SOC transitions |                  |       |       | SR transition contributions |                |       |                |                |             |       |             |             |
|------------------|------------------------------|------------------|-------|-------|-----------------------------|----------------|-------|----------------|----------------|-------------|-------|-------------|-------------|
|                  | States                       | (eV)             | $f$   | (%)   | States                      | (eV)           | $f$   | Compositions   |                |             |       |             |             |
| <b>DX1-Fe-Cl</b> | ST <sub>23</sub>             | 1.98             | 0.001 | 5     | S <sub>3</sub>              | 2.10           | 0.031 | 64%            | HOMO→LUMO      |             |       |             |             |
|                  |                              |                  |       |       |                             |                |       | 29%            | HOMO-1→LUMO    |             |       |             |             |
|                  |                              |                  |       | 95    | T <sub>7</sub>              | 1.98           | 0.000 | 65%            | HOMO→LUMO      |             |       |             |             |
|                  |                              |                  |       |       |                             |                |       | 30%            | HOMO-1→LUMO    |             |       |             |             |
|                  |                              |                  |       |       | ST <sub>24</sub>            | 2.03           | 0.001 | 1              | S <sub>4</sub> | 2.32        | 0.029 | 58%         | HOMO-1→LUMO |
|                  |                              |                  |       |       |                             |                |       |                |                |             |       | 26%         | HOMO→LUMO   |
|                  | 96                           | T <sub>8</sub>   | 2.04  | 0.000 | 65%                         | HOMO-1→LUMO    |       |                |                |             |       |             |             |
|                  |                              |                  |       |       | 31%                         | HOMO→LUMO      |       |                |                |             |       |             |             |
|                  |                              | ST <sub>27</sub> | 2.10  | 0.028 | 93                          | S <sub>3</sub> | 2.10  | 0.031          | 64%            | HOMO→LUMO   |       |             |             |
|                  |                              |                  |       |       |                             |                |       |                | 29%            | HOMO-1→LUMO |       |             |             |
|                  | 4                            |                  |       |       | T <sub>7</sub>              | 1.98           | 0.000 | 65%            | HOMO→LUMO      |             |       |             |             |
|                  |                              |                  |       |       |                             |                |       | 30%            | HOMO-1→LUMO    |             |       |             |             |
| ST <sub>28</sub> |                              |                  |       |       | 2.32                        | 0.028          | 98    | S <sub>4</sub> | 2.32           | 0.029       | 58%   | HOMO-1→LUMO |             |
|                  |                              |                  |       |       |                             |                |       |                |                |             | 26%   | HOMO→LUMO   |             |
|                  | 1                            | T <sub>8</sub>   | 2.04  | 0.000 |                             |                | 65%   | HOMO-1→LUMO    |                |             |       |             |             |
|                  |                              |                  |       |       |                             |                | 31%   | HOMO→LUMO      |                |             |       |             |             |
|                  |                              | ST <sub>23</sub> | 1.94  | 0.003 |                             |                | 12    | S <sub>3</sub> | 2.08           | 0.025       | 12%   | HOMO→LUMO   |             |
|                  |                              |                  |       |       |                             |                |       |                |                |             | 79%   | HOMO-1→LUMO |             |

|                 |                  |      |       |    |                |      |       |     |             |
|-----------------|------------------|------|-------|----|----------------|------|-------|-----|-------------|
|                 |                  |      |       | 87 | T <sub>7</sub> | 1.96 | 0.000 | 91% | HOMO→LUMO   |
|                 |                  |      |       |    |                |      |       | 0%  | HOMO-1→LUMO |
|                 | ST <sub>24</sub> | 2.01 | 0.002 | 5  | S <sub>4</sub> | 2.26 | 0.023 | 77% | HOMO-1→LUMO |
|                 |                  |      |       |    |                |      |       | 11% | HOMO→LUMO   |
|                 |                  |      |       | 92 | T <sub>8</sub> | 2.02 | 0.000 | 1%  | HOMO-1→LUMO |
|                 |                  |      |       |    |                |      |       | 95% | HOMO→LUMO   |
|                 | ST <sub>27</sub> | 2.10 | 0.021 | 85 | S <sub>3</sub> | 2.08 | 0.025 | 12% | HOMO→LUMO   |
|                 |                  |      |       |    |                |      |       | 79% | HOMO-1→LUMO |
|                 |                  |      |       | 11 | T <sub>7</sub> | 1.96 | 0.000 | 91% | HOMO→LUMO   |
|                 |                  |      |       |    |                |      |       | 0%  | HOMO-1→LUMO |
|                 | ST <sub>28</sub> | 2.27 | 0.022 | 94 | S <sub>4</sub> | 2.26 | 0.023 | 77% | HOMO-1→LUMO |
|                 |                  |      |       |    |                |      |       | 11% | HOMO→LUMO   |
|                 |                  |      |       | 5  | T <sub>8</sub> | 2.02 | 0.000 | 1%  | HOMO-1→LUMO |
|                 |                  |      |       |    |                |      |       | 95% | HOMO→LUMO   |
| <b>DX1-Fe-I</b> | ST <sub>23</sub> | 1.91 | 0.006 | 29 | S <sub>3</sub> | 2.09 | 0.021 | 2%  | HOMO→LUMO   |
|                 |                  |      |       |    |                |      |       | 78% | HOMO-1→LUMO |
|                 |                  |      |       | 66 | T <sub>7</sub> | 2.00 | 0.000 | 73% | HOMO→LUMO   |
|                 |                  |      |       |    |                |      |       | 17% | HOMO-1→LUMO |
|                 | ST <sub>24</sub> | 1.97 | 0.004 | 25 | S <sub>4</sub> | 2.23 | 0.013 | 1%  | HOMO-1→LUMO |
|                 |                  |      |       |    |                |      |       | 91% | HOMO→LUMO   |
|                 |                  |      |       | 70 | T <sub>8</sub> | 2.06 | 0.000 | 74% | HOMO-1→LUMO |
|                 |                  |      |       |    |                |      |       | 17% | HOMO→LUMO   |
|                 | ST <sub>27</sub> | 2.16 | 0.014 | 67 | S <sub>3</sub> | 2.09 | 0.021 | 2%  | HOMO→LUMO   |
|                 |                  |      |       |    |                |      |       | 78% | HOMO-1→LUMO |

---

|                  |      |       |    |                |      |       |     |             |
|------------------|------|-------|----|----------------|------|-------|-----|-------------|
|                  |      |       | 26 | T <sub>7</sub> | 2.00 | 0.000 | 73% | HOMO→LUMO   |
|                  |      |       |    |                |      |       | 17% | HOMO-1→LUMO |
| ST <sub>28</sub> | 2.27 | 0.009 | 67 | S <sub>4</sub> | 2.23 | 0.013 | 1%  | HOMO-1→LUMO |
|                  |      |       |    |                |      |       | 91% | HOMO→LUMO   |
|                  |      |       | 24 | T <sub>8</sub> | 2.06 | 0.000 | 74% | HOMO-1→LUMO |
|                  |      |       |    |                |      |       | 17% | HOMO→LUMO   |

---

### Part 3 : Comparison of the scalar TDDFT, TDDFT based on perturbation of spin-orbit and full two-component TDDFT

Fig. S2 shows the absorption spectra of DX1-Ru-I having the largest SO matrix elements, calculated by scalar relativistic theory (called SR-TDDFT in this paper), perturbation theory (SO-TDDFT) and full two-component theory. SO-TDDFT can perturbatively estimate the effect of SOI, and the differences of excitation energies between SO-TDDFT and full two-component TDDFT are estimated to be within 0.03 eV. On the other hand, SR-TDDFT cannot reproduce spin-forbidden peaks in the long wavelength region as can be confirmed in the absorption spectra obtained by SO-TDDFT and full two-component TDDFT.

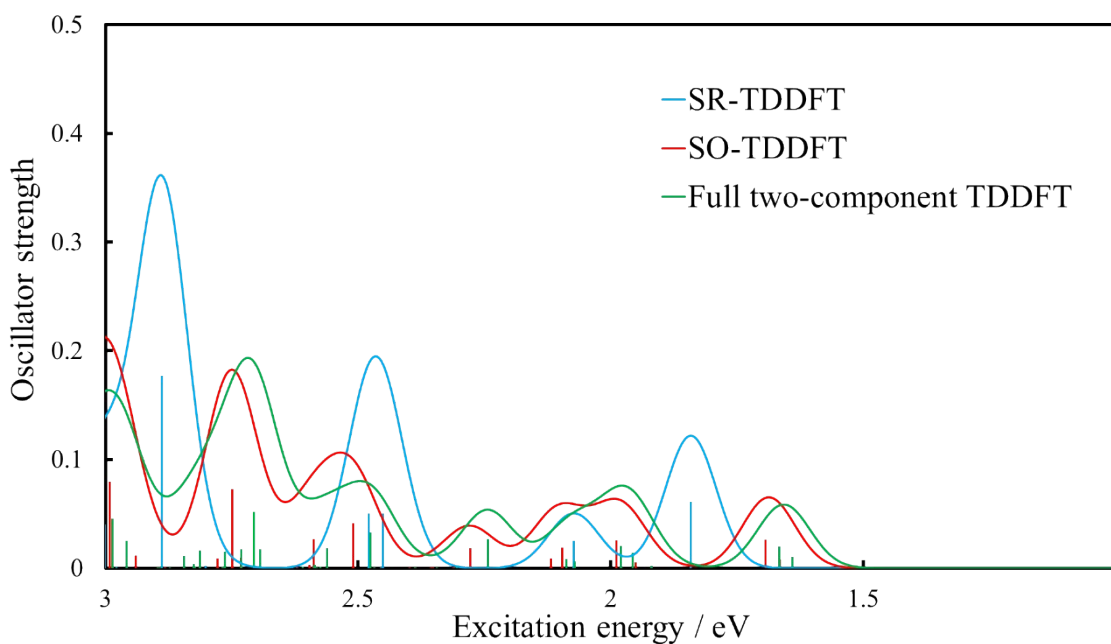

**Fig. S2** Absorption spectra of DX1-Ru-I in acetonitrile solution calculated by SR-TDDFT (blue line), SO-TDDFT (red line) and full two-component theory (green line). All spectra are interpolated using Gaussian functions with  $\sigma = 0.05$  eV.
